# Supplementary material for: Insights into dioxygen binding on metal centers: an ab initio multireference electronic structure analysis
Source: Royal Society of Chemistry journal article supplement (doi:10.1039/d4cp02915a), 2024-01-01
Supplement: d4cp02915a1.pdf [file d4cp02915a1.pdf]

# **Supporting Information For Insights into Dioxygen Binding on Nonheme Metal Centers: An ab initio Multireference Electronic Structure Analysis**

Peng Zhang<sup>a,b</sup>, Way-Zen Lee<sup>c,d</sup>, Shengfa Ye<sup>a\*</sup>

<sup>a</sup>State Key Laboratory of Catalysis, Dalian Institute of Chemical Physics, Chinese Academy of Sciences, Dalian 116023, China

<sup>b</sup>University of Chinese Academy of Sciences, Beijing 100049, China

<sup>c</sup>Department of Chemistry, National Taiwan Normal University, Taipei 11677, Taiwan

<sup>d</sup>Department of Medicinal and Applied Chemistry, Kaohsiung Medical University, Kaohsiung 807, Taiwan

|                                                                                                                          | $S = \frac{5}{2}$                                   | $S = \frac{3}{2}$                                   | $S = \frac{1}{2}$                                     |
|--------------------------------------------------------------------------------------------------------------------------|-----------------------------------------------------|-----------------------------------------------------|-------------------------------------------------------|
| <b>CAS(13,9)</b><br>$d_{xz}d_{yz}d_{xy}d_{x^2-y^2}d_{z^2}\pi_{op}\pi_{ip}\pi_{op}^*\pi_{ip}^*$                           | <br>Co: 2.85 (2.90)<br>O <sub>2</sub> : 1.99 (2.00) | <br>Co: 2.09 (2.12)<br>O <sub>2</sub> : 0.80 (0.80) | <br>Co: 1.58 (1.61)<br>O <sub>2</sub> : -0.66 (-0.66) |
|                                                                                                                          | 88 % 221112211                                      | 87 % 221112211                                      | 87 % 221112211                                        |
| <b>CAS(15,10)</b><br>$\sigma_{eq}d_{xz}d_{yz}d_{xy}d_{x^2-y^2}d_{z^2}\pi_{op}\pi_{ip}\pi_{op}^*\pi_{ip}^*$               | 88 % 2221112211                                     | 87 % 2221112211                                     | 86 % 2221112211                                       |
| <b>CAS(15,11)</b><br>$d_{xz}d_{yz}d_{xy}d_{x^2-y^2}d_{z^2}\pi_{op}\pi_{ip}\pi_{op}^*\pi_{ip}^*\sigma\sigma^*$            | 88 % 22111221120                                    | 88 % 22111221120                                    | 87 % 22111221120                                      |
| <b>CAS(17,12)</b><br>$\sigma_{eq}d_{xz}d_{yz}d_{xy}d_{x^2-y^2}d_{z^2}\pi_{op}\pi_{ip}\pi_{op}^*\pi_{ip}^*\sigma\sigma^*$ | 88 % 22111221120                                    | 87 % 22111221120                                    | 87 % 22111221120                                      |

**Fig. S1.** Spin populations on the Co center and the O<sub>2</sub> moiety, spin density and electron configurations for each spin state from CASSCF calculations with different choices of active spaces for complex Co(II)(BDPP) at the Co-O<sub>2</sub> bond length of 4.50 Å, only Co center and atoms of the first coordination-shell are shown for clarity.

|                                                                                                                          | $S = \frac{5}{2}$                                   | $S = \frac{3}{2}$                                     | $S = \frac{1}{2}$                                   |
|--------------------------------------------------------------------------------------------------------------------------|-----------------------------------------------------|-------------------------------------------------------|-----------------------------------------------------|
| <b>CAS(13,9)</b><br>$d_{xz}d_{yz}d_{xy}d_{x^2-y^2}d_{z^2}\pi_{op}\pi_{ip}\pi_{op}^*\pi_{ip}^*$                           | <br>Co: 3.66 (3.68)<br>O <sub>2</sub> : 1.03 (1.05) | <br>Co: 3.28 (3.30)<br>O <sub>2</sub> : -0.52 (-0.54) | <br>Co: 0.01 (0.00)<br>O <sub>2</sub> : 0.98 (0.99) |
|                                                                                                                          | 100 % 221112211                                     | 95 % 221112211                                        | 95 % 221102212                                      |
| <b>CAS(15,10)</b><br>$\sigma_{eq}d_{xz}d_{yz}d_{xy}d_{x^2-y^2}d_{z^2}\pi_{op}\pi_{ip}\pi_{op}^*\pi_{ip}^*$               | 99 % 2221112211                                     | 94 % 2221112211                                       | 93 % 2221102212                                     |
| <b>CAS(15,11)</b><br>$d_{xz}d_{yz}d_{xy}d_{x^2-y^2}d_{z^2}\pi_{op}\pi_{ip}\pi_{op}^*\pi_{ip}^*\sigma\sigma^*$            | 96 % 22111221120                                    | 89 % 22111221120                                      | 91 % 2211022120                                     |
| <b>CAS(17,12)</b><br>$\sigma_{eq}d_{xz}d_{yz}d_{xy}d_{x^2-y^2}d_{z^2}\pi_{op}\pi_{ip}\pi_{op}^*\pi_{ip}^*\sigma\sigma^*$ | 95 % 22111221120                                    | 87 % 22111221120                                      | 89 % 2211022120                                     |

**Fig. S1.** Spin populations on the Co center and the O<sub>2</sub> moiety, spin density and electron configurations for each spin state from CASSCF calculations with different choices of active spaces

for complex Co(II)(BDPP) at the Co-O<sub>2</sub> bond length of 1.91 Å, only Co center and atoms of the first coordination-shell are shown for clarity.

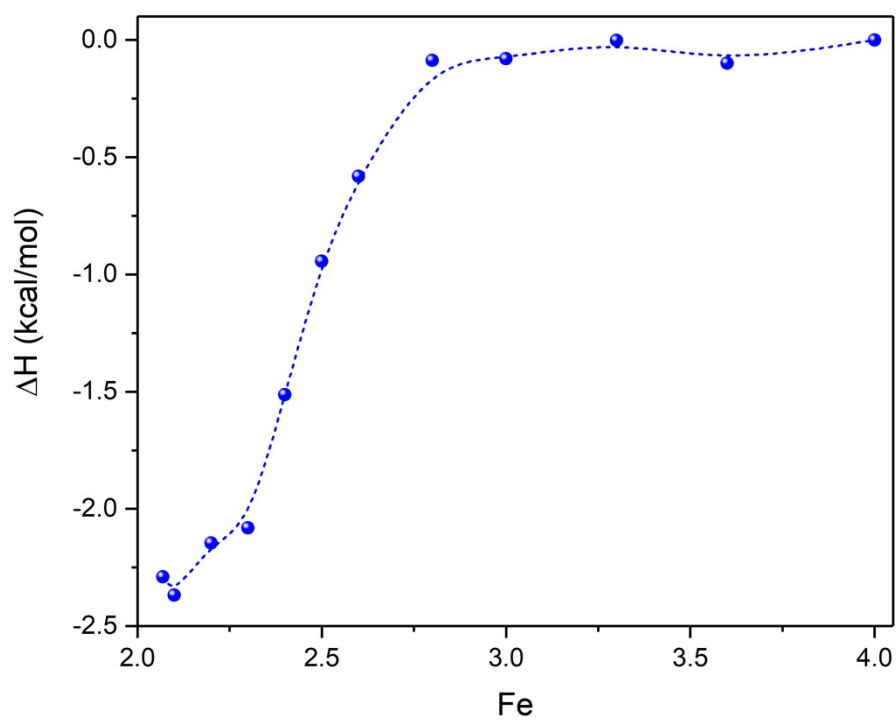

**Fig. S3.** DFT energy variation for the reaction of Fe(II)(BDPP) with O<sub>2</sub> on the septet potential energy surface as a function of the Fe-O<sub>2</sub> bond distance

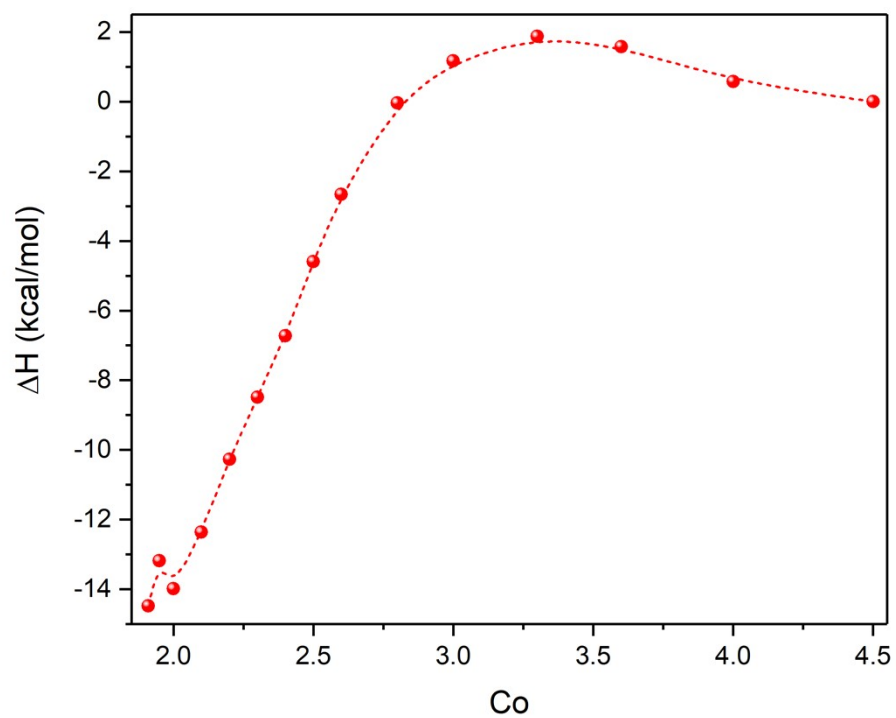

**Fig. S4.** DFT energy variation for the reaction of Co(II)(BDPP) with O<sub>2</sub> on the doublet potential energy surface as a function of the Co-O<sub>2</sub> bond distance

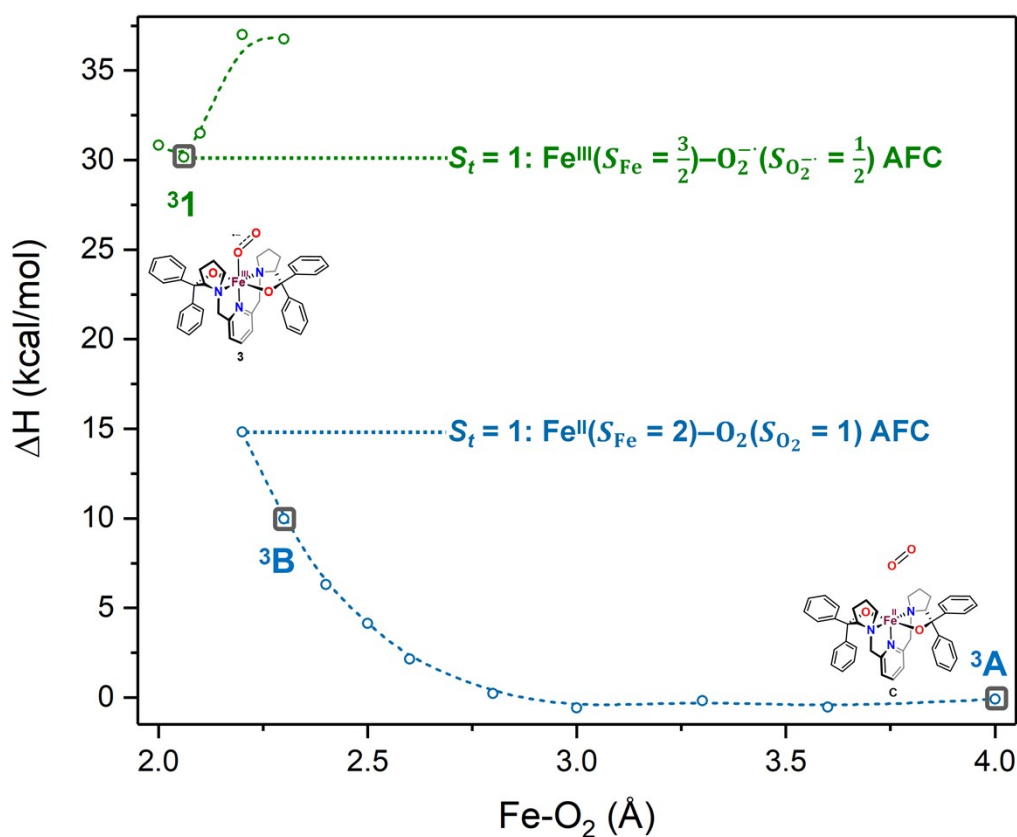

### spin density and spin populations

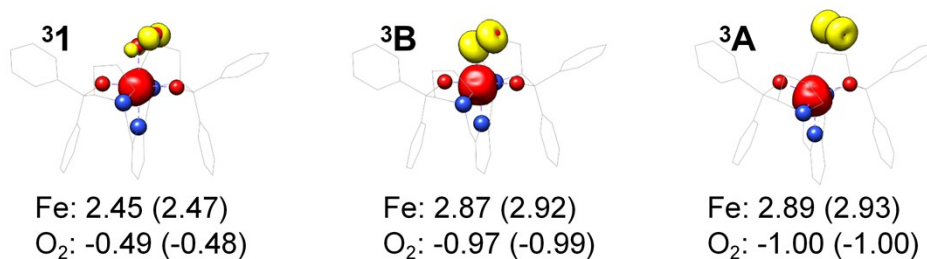

**Fig. S5.** (top) CASSCF(12,9)/NEVPT2 energy variation for the triplet reaction of Fe(II)(BDPP) with O<sub>2</sub> as a function of the Fe–O<sub>2</sub> bond distance; dot lines denote diabatic potential curves (azure line denotes an  $S_t = 1$  Fe<sup>II</sup>-O<sub>2</sub> complex, interpreted as an  $S_{Fe} = 2$  Fe<sup>II</sup> center antiferromagnetically coupled (AFC) with an  $S_{O_2} = 1$  O<sub>2</sub> ligand; olive line denotes an  $S_t = 1$  Fe<sup>III</sup>-O<sub>2</sub><sup>-</sup> complex, interpreted as an  $S_{Fe} = \frac{3}{2}$  Fe<sup>III</sup> center antiferromagnetically coupled (AFC) with an  $S_{O_2^-} = \frac{1}{2}$  O<sub>2</sub><sup>-</sup> ligand); (bottom) spin density and Löwdin spin populations on Fe center and O<sub>2</sub> unit calculated for complexes <sup>3</sup>A (Fe(II)(BDPP) + O<sub>2</sub>), <sup>3</sup>B, and <sup>3</sup>1 on the reaction trajectory are shown at the bottom and Mulliken spin populations featuring the same results are listed in parentheses, yellow and red denote negative and positive spin density, respectively, and local spin populations were also listed in **Table S4**; ligand atoms are omitted for clarity.

The binding of O<sub>2</sub> to Fe(II)(BDPP) on  $S_t = 1$  potential surface also features two diabatic potential curves. One curve (azure line), described as a high spin Fe(II) center ( $S_{\text{Fe}} = 2$ ) antiferromagnetically coupled with a triplet O<sub>2</sub> ligand ( $S_{\text{O}_2} = 1$ ) (*vide infra*), rises in energy as the Fe-O<sub>2</sub> length declines from 4.00 Å to 2.20 Å, the other one (olive line), interpreted as a quartet Fe(III) center ( $S_{\text{Fe}} = \frac{3}{2}$ ) antiferromagnetically coupled with a doublet superoxo ligand ( $S_{\text{O}_2} = \frac{1}{2}$ ) (For more details, see below), decreases ranging from the Fe-O<sub>2</sub> length of 2.30 Å to 2.06 Å and increases for further reduction of the Fe-O<sub>2</sub> length, thus featuring a local minimal around 2.06 Å, which is 30.2 kcal/mol higher than complex **3A** in energy.

Complex **3A** with a Fe-O<sub>2</sub> bond length of 4.00 Å maintains a triplet ground state with a leading electron configuration of  $d_{xz}^2 d_{yz}^1 d_{xy}^1 d_{x^2-y^2}^1 d_z^1 \pi_{ip}^2 \pi_{op}^2 \pi_{ip}^* 1 \pi_{op}^* 1$  which occupies 94%. As demonstrated in **Fig. S5**, a double-layer donut-shaped spin density for the O<sub>2</sub> ligand and a nearly spherical spin density for the Fe(II) center suggest that spin populations are concentrated on a high spin Fe(II) center and  $\pi_{ip}^*$  and  $\pi_{op}^*$  MOs. Specifically, a high spin Fe(II) center is antiferromagnetically coupled to a triplet O<sub>2</sub> ligand. Therefore, following the same procedure, the

electronic structure of complex **3A** could be evaluated as  $|1,1\rangle = \sqrt{\frac{3}{5}}|2,-1\rangle - \sqrt{\frac{3}{10}}|1,0\rangle + \sqrt{\frac{1}{10}}|0,1\rangle$ . This wavefunction yields the expectation values of  $S_z$  for Fe(II) center and O<sub>2</sub> ligand of  $\frac{3}{2}$  and  $-\frac{1}{2}$ , respectively.

The computed spin populations on Fe(II) center and O<sub>2</sub> ligand are 2.89 and -1.00, respectively, which are twice the expectation values of  $S_z$  for Fe(II) center and O<sub>2</sub> ligand, respectively, and confirm this wavefunction.

As depicted in **Fig. S5**, **31** converges to a triplet state featuring noteworthy multireference character with a series of electron configurations of  $d_{xz}^1 d_{yz}^1 d_{xy}^2 d_{x^2-y^2}^0 d_z^2 \pi_{ip}^2 \pi_{op}^2 \pi_{ip}^* 2 \pi_{op}^* 1$  which account

for 30%,  $d_{xz}^2 d_{yz}^1 d_{xy}^2 d_{x^2-y^2}^0 d_z^2 \pi_{ip}^2 \pi_{op}^2 \pi_{ip}^* 2 \pi_{op}^* 0$  which makes up 39%, and  $d_{xz}^0 d_{yz}^1 d_{xy}^2 d_{x^2-y^2}^0 d_z^2 \pi_{ip}^2 \pi_{op}^2 \pi_{ip}^* 2 \pi_{op}^* 2$  which occupies 27%. The last two terms show a

remarkable chemical bonding interaction between  $d_{xz}$  and MO  $\pi_{op}^*$ . Again, the spin density on the O<sub>2</sub> ligand suggests negative spin is located on  $\pi_{op}^*$ , indicating the formation of a doublet superoxo ligand; the less spherical spin density for Fe(III) center compared to that for complex **71**, indicates the formation of an intermediate spin Fe(III) center. As such, the electronic structure of complex **31** could be evaluated as a quartet Fe(III) center ( $S_{\text{Fe}} = \frac{3}{2}$ ) antiferromagnetically coupled with a

superoxo ligand ( $S_z = \frac{1}{2}$ ) via a wavefunction of  $|1,1\rangle = \sqrt{\frac{3}{4}}\left|\frac{3}{2}, -\frac{1}{2}\right\rangle - \sqrt{\frac{1}{4}}\left|\frac{1}{2}, \frac{1}{2}\right\rangle$  for complex **31**. This wavefunction features the expectation values of  $S_z$  for Fe(III) center and O<sub>2</sub> ligand of  $\frac{5}{4}$  and  $-\frac{1}{4}$ , respectively. The computed spin populations for Fe(III) center and O<sub>2</sub> ligand are 2.45 and -0.49, respectively, indicating that the coupling wavefunction is appropriate for interpreting the electronic structure of complex **31**.

For the O<sub>2</sub> ligand binding to Fe(II)(BDPP), as the Fe-O<sub>2</sub> distance decreases from 4.00 Å to 2.20 Å (azure line), the wavefunction shows strong multireference character with a series of electron

configurations of  $d_{xz}^2 d_{yz}^1 d_{xy}^1 d_{x^2-y^2}^1 d_{z^2}^1 \pi_{ip}^2 \pi_{op}^2 \pi_{ip}^* \pi_{op}^*$ ,  $d_{xz}^2 d_{yz}^1 d_{xy}^1 d_{x^2-y^2}^1 d_{z^2}^1 \pi_{ip}^2 \pi_{op}^2 \pi_{ip}^* \pi_{op}^*$ , and  $d_{xz}^2 d_{yz}^1 d_{xy}^1 d_{x^2-y^2}^2 d_{z^2}^1 \pi_{ip}^2 \pi_{op}^2 \pi_{ip}^* \pi_{op}^*$ . The last

two terms show significant chemical bonding interaction between  $\pi_{ip}^*$  and  $d_{x^2-y^2}$ . During this process, the weights of the last two increase (0%→33% and 0%→17%) and the weight of the first one decreases (94%→37%). Starting from the Fe-O<sub>2</sub> bond length of 2.30 Å (olive line), the wavefunction remains the same as that of complex **31**. To accomplish the transformation of complex **3A** to complex **31**, an electron is shifted from the Fe(II) center to the O<sub>2</sub> ligand concurrent with an electronic-structure rearrangement of the Fe(III) center.

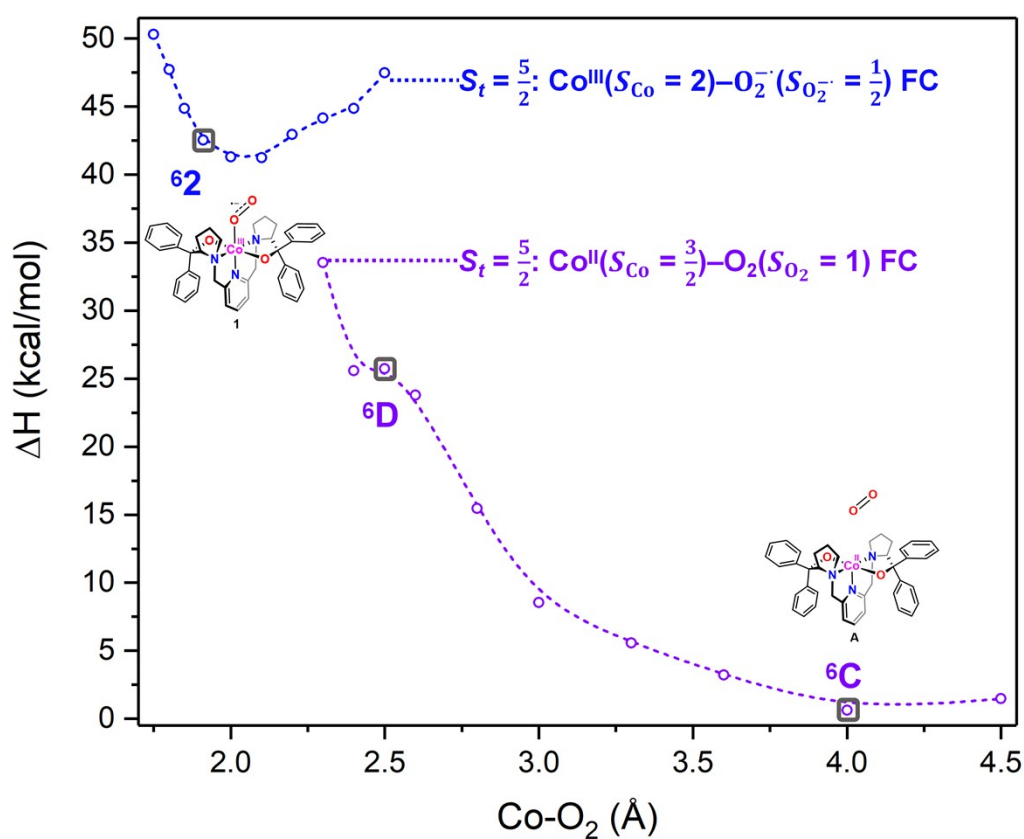

### spin density and spin populations

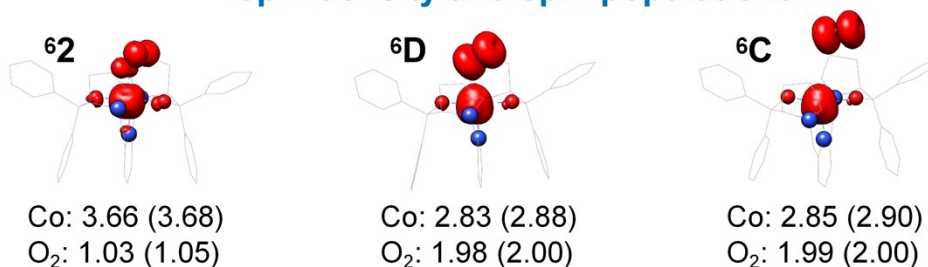

**Fig. S6.** (top) CASSCF(13,9)/NEVPT2 energy variation for the reaction of Co(II)(BDPP) with O<sub>2</sub> as a function of the Co–O<sub>2</sub> bond distance; dot lines denote diabatic potential curves (violet line denotes an  $S_t = \frac{5}{2}$  Co<sup>II</sup>-O<sub>2</sub> complex, interpreted as an  $S_{Co} = \frac{3}{2}$  Co<sup>II</sup> center ferromagnetically coupled (FC) with an  $S_{O_2} = 1$  O<sub>2</sub> ligand; blue line denotes an  $S_t = \frac{5}{2}$  Co<sup>III</sup>-O<sub>2</sub><sup>-</sup> complex, interpreted as an  $S_{Co} = 2$  Co<sup>III</sup> center ferromagnetically coupled (FC) with an  $S_{O_2^-} = \frac{1}{2}$  O<sub>2</sub><sup>-</sup> ligand); (bottom) spin density and Löwdin spin populations on Fe center and O<sub>2</sub> unit calculated for complexes <sup>6</sup>C (Co(II)(BDPP) + O<sub>2</sub>), <sup>6</sup>D, and <sup>6</sup>2 on the reaction trajectory are shown at the bottom and Mulliken spin populations featuring the same results are listed in parentheses, yellow and red denote negative and positive spin density, respectively, and local spin populations were also listed in **Table S5**; ligand atoms are omitted for clarity.



Depicted in **Fig. S6** is CASSCF(13,9) potential energy surface of O<sub>2</sub> binding on complex Co(II)(BDPP) in  $S_t = \frac{5}{2}$  state. Starting points **6C** having a Co-O<sub>2</sub> distance of 4.00 Å features a leading electron configuration of  $d_{xz}^2 d_{yz}^2 d_{xy}^1 d_{x^2-y^2}^1 d_z^2 \pi_{ip}^2 \pi_{op}^2 \pi_{ip}^* \pi_{op}^*$  accounting for 87% of the wavefunction. Therefore, its electronic structure is best characterized as a high spin Co(II) center ( $S_{Co} = \frac{3}{2}$ ) ferromagnetically coupled to a triplet O<sub>2</sub> ligand ( $S_{O_2} = 1$ ) affording an overall  $S_t = \frac{5}{2}$  state, in line with the computed spin density shown in **Fig. S6**. Furthermore, the estimated spin populations on the Co(II) center and the O<sub>2</sub> unit being 2.85 and 1.99, respectively, confirm this electronic-structure description. And complex **62** also maintains a sole electron configuration of  $d_{xz}^2 d_{yz}^1 d_{xy}^1 d_{x^2-y^2}^1 d_z^2 \pi_{ip}^2 \pi_{op}^2 \pi_{ip}^* \pi_{op}^*$  (100%) interpreted as a high spin Co(III) center ferromagnetically coupled to a doublet  $O_2^-$  ligand ( $S_{O_2^-} = \frac{1}{2}$ ) which is also confirmed by the computed spin populations on Fe(III) center and O<sub>2</sub> ligand (3.66 for Fe(III) center and 1.03 for  $O_2^-$  ligand). Furthermore, complex **62** is 41.2 kcal/mol higher than complex **6C** in energy.

For the O<sub>2</sub> binding process to afford **62**, as the Co-O<sub>2</sub> distance contracts from 4.00 Å to 2.30 Å (violet curve), the weight of the main electron configuration of  $d_{xz}^2 d_{yz}^2 d_{xy}^1 d_{x^2-y^2}^1 d_z^2 \pi_{ip}^2 \pi_{op}^2 \pi_{ip}^* \pi_{op}^*$  keeps constant and no multireference character is observed. Moreover, the spin density and spin populations computed for **6D** are nearly identical to those for **6C**, demonstrating that the electronic structure of **6D** is nearly identical to that of **6C**. Comparison of the electronic structures of complexes **6C** and **62** suggests that, as the Co-O<sub>2</sub> bond length further descends, one β electron in the Co  $d_{yz}$  orbital migrates into O<sub>2</sub>  $\pi_{ip}^*$  to furnish **62**.

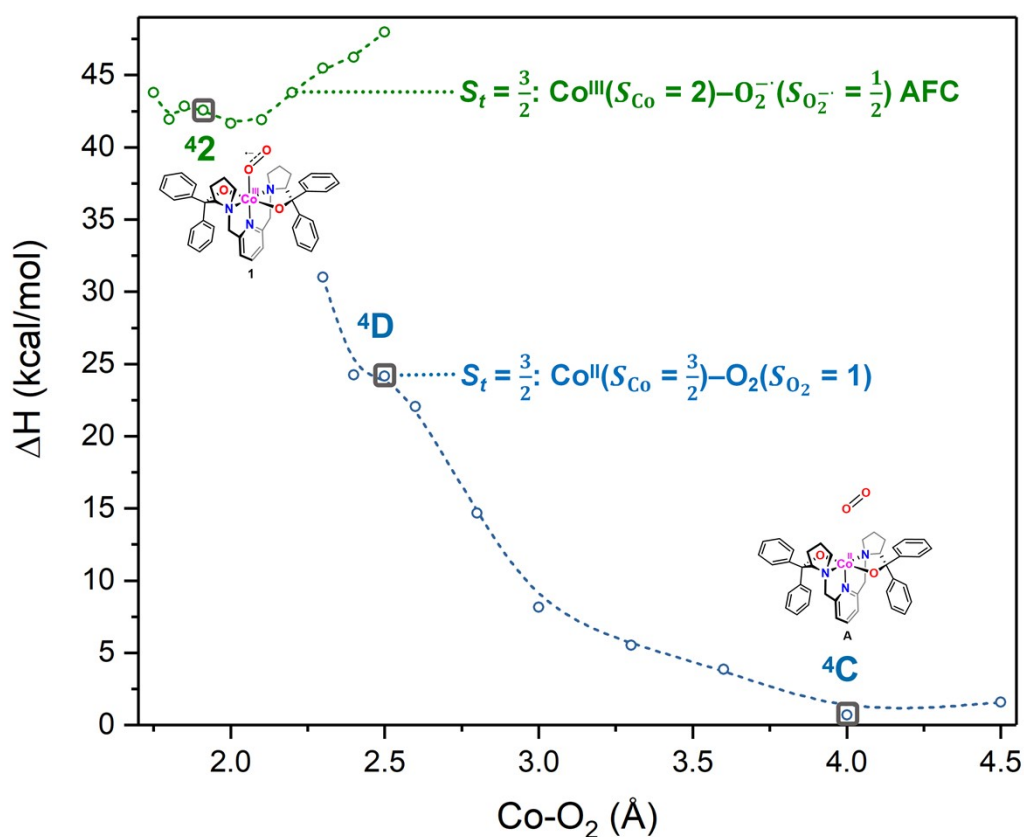

### spin density and spin populations

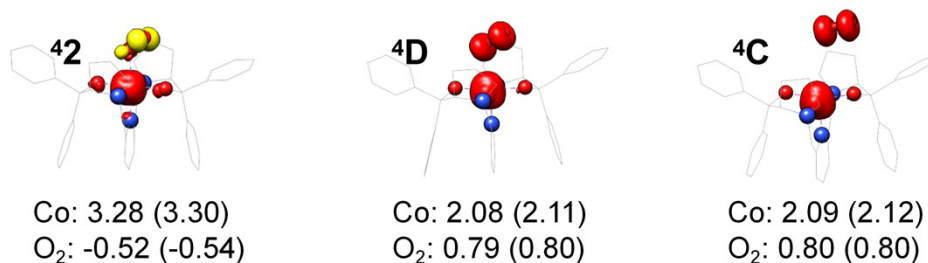

**Fig. S7.** CASSCF(13,9)/NEVPT2 energy variation for the binding of O<sub>2</sub> to Co(II)(BDPP) on  $S_t = \frac{3}{2}$  potential surface as a function of the Co-O<sub>2</sub> bond distance; dot lines donate diabatic potential curves (azure line donates a quartet Co<sup>II</sup>-O<sub>2</sub> complex, interpreted as a quartet Co<sup>II</sup> ferrimagnetically coupled with a triplet O<sub>2</sub> ligand; olive line donates a quartet Co<sup>III</sup>-O<sub>2</sub><sup>-</sup> complex, interpreted as a quartet Co<sup>III</sup> antiferromagnetically coupled (AFC) with a doublet O<sub>2</sub><sup>-</sup> ligand); (bottom) spin density and Löwdin spin populations on Fe center and O<sub>2</sub> unit calculated for complexes **4C** (Co(II)(BDPP) + O<sub>2</sub>), **4D**, and **42** on the reaction trajectory are shown at the bottom and Mulliken spin populations featuring the same results are listed in parentheses, yellow and red denote negative and positive spin density, respectively, and local spin populations were also listed in **Table S5**; ligand atoms are omitted for clarity.

As demonstrated in **Fig. S7**, the reaction of O<sub>2</sub> with Co(II)(BDPP) on  $S_t = \frac{3}{2}$  potential surface also maintains two diabatic  $S_t = \frac{3}{2}$  potential curves, whereas the azure line donates a quartet Co(II) compound magnetically coupled to a triplet O<sub>2</sub> ligand to yield an overall  $S_t = \frac{3}{2}$  ground state (see below for details), and the olive line represents a quintet Co(III) compound antiferromagnetically coupled with a doublet superoxo ligand (*vide infra*). The azure line is energetically uphill as the Co-O<sub>2</sub> distance declines from 4.00 Å to 2.30 Å, while the olive line initially decreases in energy ranging from the Co-O<sub>2</sub> distance of 2.50 Å to 2.00 Å, and rises again for further reduction of the Co-O<sub>2</sub> distance, thereby affording a local minimal around the Co-O<sub>2</sub> distance of 2.00 Å, which is 41.7 kcal/mol higher than reactant complex <sup>4</sup>C in energy.

Reactant complex <sup>4</sup>C with a Co-O<sub>2</sub> bond length of 4.00 Å, features a quartet ground state with a leading electron configuration of  $d_{xz}^2 d_{yz}^2 d_{xy}^1 d_{x^2-y^2}^1 d_{z^2}^1 \pi_{ip}^2 \pi_{op}^2 \pi_{ip}^{*1} \pi_{op}^{*1}$  which makes up 82%.

Following the same procedure, as depicted in **Fig. S7**, the spin density for complex <sup>4</sup>C is similar to that for complex <sup>6</sup>C but features a smaller size, which suggests a high spin Co(II) compound

magnetically coupled with a triplet O<sub>2</sub> ligand to yield an overall  $S_t = \frac{3}{2}$  ground state. Thus, following

the same procedure, this quartet state could be described by  $\left| \frac{3}{2} \frac{3}{2} \right\rangle = \sqrt{\frac{3}{5}} \left| \frac{3}{2} 0 \right\rangle - \sqrt{\frac{2}{5}} \left| \frac{1}{2} 1 \right\rangle$  which gives

the expectation values of  $S_z$  of  $\frac{11}{10}$  and  $\frac{2}{5}$  for the Co(II) center and the O<sub>2</sub> ligand, respectively. Thus, the computed spin populations confirm that this wavefunction could accurately describe the electronic structure of complex <sup>4</sup>C.

As shown in **Fig. S7**, the spin density on the O<sub>2</sub> ligand for complex <sup>4</sup>2 indicates negative spin is located on  $\pi_{op}^*$ , while the more spherical spin density located on Co center compared to those for complexes <sup>4</sup>C and <sup>4</sup>D, suggests a high spin Co(III) center for complex <sup>4</sup>2. As such, complex <sup>4</sup>2 is better described as a high spin Co(III) center antiferromagnetically coupled with a superoxo ligand,

which could be evaluated as  $\left| \frac{3}{2} \frac{3}{2} \right\rangle = \sqrt{\frac{4}{5}} \left| 2, -\frac{1}{2} \right\rangle - \sqrt{\frac{1}{5}} \left| 1, \frac{1}{2} \right\rangle$ . This wavefunction yields the expectation

values of  $S_z$  of  $\frac{9}{5}$  and  $-\frac{3}{10}$  for a high spin Co(III) center and a superoxo ligand, respectively. The computed spin populations of a high spin Co(II) center and a superoxo ligand (3.28 for high spin Co(III) center and -0.52 for superoxo ligand) are in line with the theoretical analyses, indicating that this wavefunction is suitable for describing the electronic structure of complex <sup>4</sup>2.

Regarding the binding process, as O<sub>2</sub> approaches Co(II)(BDPP) from 4.00 Å to 2.30 Å (azure line), the wavefunction exhibits multireference character, whereas the wavefunction of complex <sup>4</sup>D could

be evaluated by a series of electron configurations of  $d_{xz}^2 d_{yz}^2 d_{xy}^1 d_{x^2-y^2}^1 d_{z^2}^1 \pi_{ip}^2 \pi_{op}^2 \pi_{ip}^{*1} \pi_{op}^{*1}$

which accounts for 32%,  $d_{xz}^2 d_{yz}^2 d_{xy}^1 d_{x^2-y^2}^1 d_{z^2}^0 \pi_{ip}^2 \pi_{op}^2 \pi_{ip}^{*2} \pi_{op}^{*1}$  which makes up 32%, and  $d_{xz}^2 d_{yz}^2 d_{xy}^1 d_{x^2-y^2}^1 d_{z^2}^2 \pi_{ip}^2 \pi_{op}^2 \pi_{ip}^{*0} \pi_{op}^{*1}$  which occupies 16%. The last two configurations demonstrate strong chemical bonding interaction between  $\pi_{ip}^*$  and  $d_{z^2}$  MOs. Spin density for complex **4D**, which is similar to that for complex **4C**, suggests the shift of positive spin on  $\pi_{ip}^*$  to  $\pi_{op}^*$ , indicating the preparation for electron transfer from the Co(II) center to the O<sub>2</sub> ligand. Starting from the Co-O<sub>2</sub> distance of 2.50 Å, **42** could converge to another quartet wavefunction (olive line) with a leading electron configuration of  $d_{xz}^2 d_{yz}^1 d_{xy}^1 d_{x^2-y^2}^1 d_{z^2}^1 \pi_{ip}^2 \pi_{op}^2 \pi_{ip}^{*2} \pi_{op}^{*1}$  which accounts for 95%. To finish the conversion of complexes **4C** to **42**, one electron is shifted from the Co(II) center to the O<sub>2</sub> ligand in combination with a fast reorganization of the electronic structure of the Co(III) center.

**Table S1.** Configuration and weights for complex **2** at the Co-O<sub>2</sub> bond length of 1.91 Å with distinct basis sets from CASSCF(13,9)/NEVPT2 calculations.

|           | configuration | def2-SV | def2-SVP | def2-TZVP | def2-TZVPP |
|-----------|---------------|---------|----------|-----------|------------|
| doublet   | 222222100     | 0.94339 | 0.94662  | 0.94776   | 0.94806    |
| quartet   | 222211111     | 0.93259 | 0.94809  | 0.95315   | 0.95391    |
| sextuplet | 222211111     | 0.99084 | 0.94809  | 0.99600   | 0.99660    |

**Table S2.** Configuration and weights for complex **2** at the Co-O<sub>2</sub> bond length of 4.50 Å with distinct basis sets from CASSCF(13,9)/NEVPT2 calculations.

|         | configuration | def2-SV | def2-SVP | def2-TZVP | def2-TZVPP |
|---------|---------------|---------|----------|-----------|------------|
| doublet | 222222100     | 0.86253 | 0.87038  | 0.86511   | 0.85727    |
| quartet | 222211111     | 0.86430 | 0.87296  | 0.87059   | 0.86718    |
| sextet  | 222211111     | 0.86721 | 0.87729  | 0.87968   | 0.88363    |

**Table S3.** Configuration and weights for complex **2** at the Co-O<sub>2</sub> bond length of 2.50 Å with distinct basis sets from CASSCF(13,9)/NEVPT2 calculations.

|         | configuration | def2-SV | def2-SVP | def2-TZVP | def2-TZVPP |
|---------|---------------|---------|----------|-----------|------------|
| doublet | 222222100     | 0.86253 | 0.87038  | 0.86511   | 0.85727    |
| quartet | 222211111     | 0.86430 | 0.87296  | 0.87059   | 0.86718    |
| sextet  | 222211111     | 0.86721 | 0.87729  | 0.87968   | 0.88363    |

**Table S4.** Local spin populations for Fe center and O<sub>2</sub> ligand from CASSCF(12,9)/NEVPT2 calculations.

|    | <sup>3</sup> A | <sup>3</sup> B | <sup>3</sup> 1 | <sup>5</sup> A | <sup>5</sup> B | <sup>5</sup> 1 | <sup>7</sup> A | <sup>7</sup> B | <sup>7</sup> 1 |
|----|----------------|----------------|----------------|----------------|----------------|----------------|----------------|----------------|----------------|
| Fe | 2.79           | 2.76           | 2.37           | 3.10           | 3.09           | 4.30           | 3.72           | 3.73           | 4.62           |

|                |       |       |       |      |      |       |      |      |      |
|----------------|-------|-------|-------|------|------|-------|------|------|------|
| O <sub>2</sub> | -0.98 | -0.93 | -0.46 | 0.66 | 0.65 | -0.59 | 1.97 | 1.93 | 0.99 |
|----------------|-------|-------|-------|------|------|-------|------|------|------|

**Table S5.** Local spin populations for Co center and O<sub>2</sub> ligand from CASSCF(13,9)/NEVPT2 calculations.

|                | <sup>2</sup> C | <sup>2</sup> D | <sup>2</sup> 2 | <sup>4</sup> C | <sup>4</sup> D | <sup>4</sup> 2 | <sup>6</sup> C | <sup>6</sup> D | <sup>6</sup> 2 |
|----------------|----------------|----------------|----------------|----------------|----------------|----------------|----------------|----------------|----------------|
| Co             | 1.56           | 1.52           | 0.01           | 2.03           | 2.02           | 3.23           | 2.77           | 2.76           | 3.60           |
| O <sub>2</sub> | -0.66          | -0.62          | 0.92           | 0.79           | 0.76           | -0.50          | 1.97           | 1.91           | 0.97           |

**Table S6.** Löwdin spin populations for Fe center and O<sub>2</sub> ligand from DFT calculations.

|                | <sup>3</sup> A | <sup>3</sup> B | <sup>3</sup> 1 | <sup>5</sup> A | <sup>5</sup> B | <sup>5</sup> 1 | <sup>7</sup> A | <sup>7</sup> B | <sup>7</sup> 1 |
|----------------|----------------|----------------|----------------|----------------|----------------|----------------|----------------|----------------|----------------|
| Fe             | 3.62           | 3.24           | 3.08           | 1.90           | 3.20           | 4.09           | 3.62           | 4.01           | 4.10           |
| O <sub>2</sub> | -1.99          | -1.50          | -1.31          | 1.99           | 0.56           | -0.78          | 2.00           | 1.33           | 1.20           |

**Table S7.** Mulliken spin populations for Fe center and O<sub>2</sub> ligand from DFT calculations.

|                | <sup>3</sup> A | <sup>3</sup> B | <sup>3</sup> 1 | <sup>5</sup> A | <sup>5</sup> B | <sup>5</sup> 1 | <sup>7</sup> A | <sup>7</sup> B | <sup>7</sup> 1 |
|----------------|----------------|----------------|----------------|----------------|----------------|----------------|----------------|----------------|----------------|
| Fe             | 3.71           | 3.34           | 3.18           | 1.93           | 3.29           | 4.15           | 3.71           | 4.08           | 4.16           |
| O <sub>2</sub> | -2.00          | -1.52          | -1.33          | 2.00           | 0.55           | -0.79          | 2.00           | 1.33           | 1.20           |

**Table S8.** Löwdin spin populations for Co center and O<sub>2</sub> ligand from DFT calculations.

|                | <sup>2</sup> C | <sup>2</sup> D | <sup>2</sup> 2 | <sup>4</sup> C | <sup>4</sup> D | <sup>4</sup> 2 | <sup>6</sup> C | <sup>6</sup> D | <sup>6</sup> 2 |
|----------------|----------------|----------------|----------------|----------------|----------------|----------------|----------------|----------------|----------------|
| Co             | 2.59           | 1.67           | -0.02          | 0.93           | 1.61           | 1.82           | 2.59           | 2.83           | 3.03           |
| O <sub>2</sub> | -1.99          | -0.80          | 1.00           | 1.99           | 1.16           | 0.85           | 1.99           | 1.46           | 1.13           |

**Table S9.** Mulliken spin populations for Co center and O<sub>2</sub> ligand from DFT calculations.

|                | <sup>2</sup> C | <sup>2</sup> D | <sup>2</sup> 2 | <sup>4</sup> C | <sup>4</sup> D | <sup>4</sup> 2 | <sup>6</sup> C | <sup>6</sup> D | <sup>6</sup> 2 |
|----------------|----------------|----------------|----------------|----------------|----------------|----------------|----------------|----------------|----------------|
| Co             | 2.62           | 1.69           | -0.03          | 0.94           | 1.63           | 1.84           | 2.62           | 2.83           | 3.00           |
| O <sub>2</sub> | -1.99          | -0.90          | 1.01           | 1.99           | 1.18           | 0.85           | 1.99           | 1.46           | 1.14           |

**Table S10.** Energy variations for the reaction of O<sub>2</sub> with complex Co(II)(BDPP) from CASSCF and CASSCF/NEVPT2 calculations (kcal/mol).

| Co-O (Å) | $S = \frac{1}{2}$ |        | $S = \frac{3}{2}$ |        | $S = \frac{5}{2}$ |        |
|----------|-------------------|--------|-------------------|--------|-------------------|--------|
|          | CASSCF            | NEVPT2 | CASSCF            | NEVPT2 | CASSCF            | NEVPT2 |
| 1.8      | 84.0              | 9.6    | 75.6              | 42.2   | 78.7              | 49.3   |
| 1.8      | 82.0              | 7.5    | 73.0              | 40.4   | 75.4              | 46.1   |
| 1.9      | 81.1              | 5.9    | 71.7              | 41.4   | 72.4              | 43.3   |
| 1.9      | 81.5              | 5.8    | 70.5              | 41.2   | 70.3              | 40.9   |
| 2.0      | 83.6              | 7.7    | 70.0              | 40.4   | 69.6              | 39.7   |
| 2.1      | 87.2              | 10.0   | 71.5              | 40.5   | 71.1              | 39.7   |
| 2.2      | 91.5              | 14.2   | 73.8              | 42.3   | 73.5              | 41.6   |
| 2.3      | 55.0              | 18.2   | 55.8              | 30.1   | 57.6              | 33.3   |
| 2.4      | 42.5              | 22.2   | 43.0              | 23.2   | 44.2              | 25.3   |
| 2.5      | 42.9              | 22.6   | 43.3              | 23.4   | 44.2              | 24.9   |
